# Supplementary material for: Acute Recanalization of Thrombo-Embolic Ischemic Stroke with pREset (ARTESp): the impact of occlusion time on clinical outcome of directly admitted and transferred patients
Source: PubMed Central journal article supplement — J Neurointerv Surg. 2016 Aug 16;9(9):817–22. doi: 10.1136/neurintsurg-2016-012556 (PMC5574392; doi:10.1136/neurintsurg-2016-012556), 2016-08-16
Supplement: neurintsurg-2016-012556supp001.pdf [file neurintsurg-2016-012556supp001.pdf]

## **INCLUSION CRITERIA**

### **INCLUSION CRITERIA**

- Patient age  $\geq 18$  and  $\leq 85$  years.
- Patients with acute-onset stroke in the 0-6 hour time window for cerebral onset of symptoms and in angiography with a TICI reperfusion (Thrombolysis in Cerebral Infarction) value of 0 or 1 of at least one major cerebral artery (carotid artery, middle cerebral artery, anterior cerebral artery, basilar artery, vertebral artery, posterior cerebral artery).
- NIHSS (National Institutes of Health Stroke Scale)  $\geq 8$
- Signed Informed Consent by patient / legal representative to participate in the study

### **EXCLUSION CRITERIA**

- Pregnancy
- Demarcated infarcted area in the initial Cranial CT or intracranial haemorrhage
- Rapid improvement of neurological symptoms
- NIHSS  $> 30$
- Anticoagulation with warfarin with INR (international normalized ratio)  $> 3.0$
- Platelets  $< 30,000$
- Glucose  $< 50\text{mg/dl}$
- Life expectancy  $< 90$  days
